# Supplementary material for: miRNA arm selection and isomiR distribution in gastric cancer
Source: PubMed Central journal article supplement (PMC3303722; doi:10.1186/1471-2164-13-s1-s13), 2012-01-17

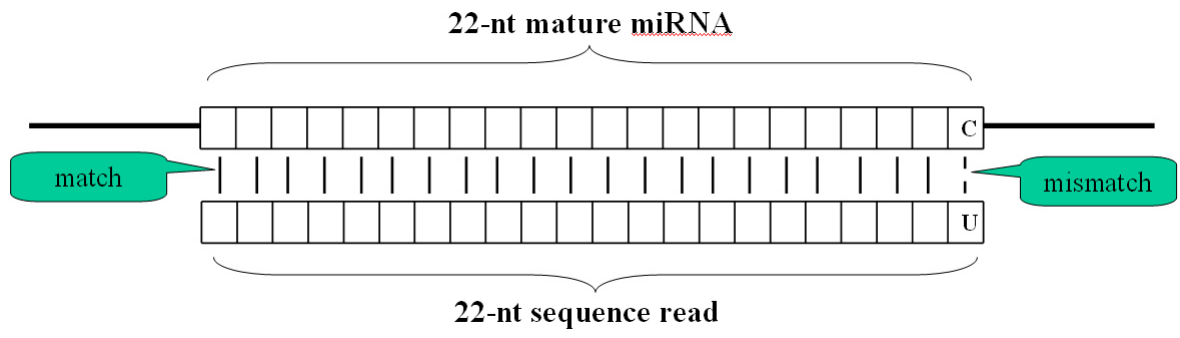

Supplement: 1471-2164-13-S1-S13-S4.pdf [file 1471-2164-13-S1-S13-S4.pdf]
